# Supplementary material for: Structural damage progression in patients with early rheumatoid arthritis treated with methotrexate, baricitinib, or baricitinib plus methotrexate based on clinical response in the phase 3 RA-BEGIN study
Source: PubMed Central journal article supplement (PMC6097080; doi:10.1007/s10067-018-4221-0), 2018-08-04

## Online Resource 1

**Article title:** Structural damage progression in patients with early rheumatoid arthritis treated with methotrexate, baricitinib or baricitinib plus methotrexate based on clinical response in the phase 3 RA-BEGIN study

**Journal:** *Clinical Rheumatology*

**Authors:** Désirée van der Heijde, Patrick Durez, Georg Schett, Esperanza Naredo, Mikkel Østergaard, Gabriella Meszaros, Francesco De Leonardis, Inmaculada de la Torre, Pedro López-Romero, Douglas Schlichting, Eric Nantz, Roy Fleischmann

**Affiliation of corresponding author:** Leiden University Medical Center, Leiden, The Netherlands, email address: mail@dvanderheijde.nl

**Legend:** Heatmaps showing individual DAS28-hsCRP responses to treatment in  
**(a)** DAS28-Group A (sustained DAS28-hsCRP  $\leq 3.2$  at weeks 16, 20 and 24) and  
**(b)** DAS28-Group B (DAS28-hsCRP  $> 3.2$  or missing data at any of weeks 16, 20 and 24).

*Bari* baricitinib, *base* baseline, *DAS28* Disease Activity Score for 28-joint counts, *hsCRP* high-sensitivity C-reactive protein, *MTX* methotrexate, *NA* not available, *w* week

DAS28-hsCRP colour codes: ■  $\leq 2.6$  ■  $> 2.6$  to  $\leq 3.2$  ■  $> 3.2$  to  $\leq 5.1$  ■  $> 5.1$  ■ NA

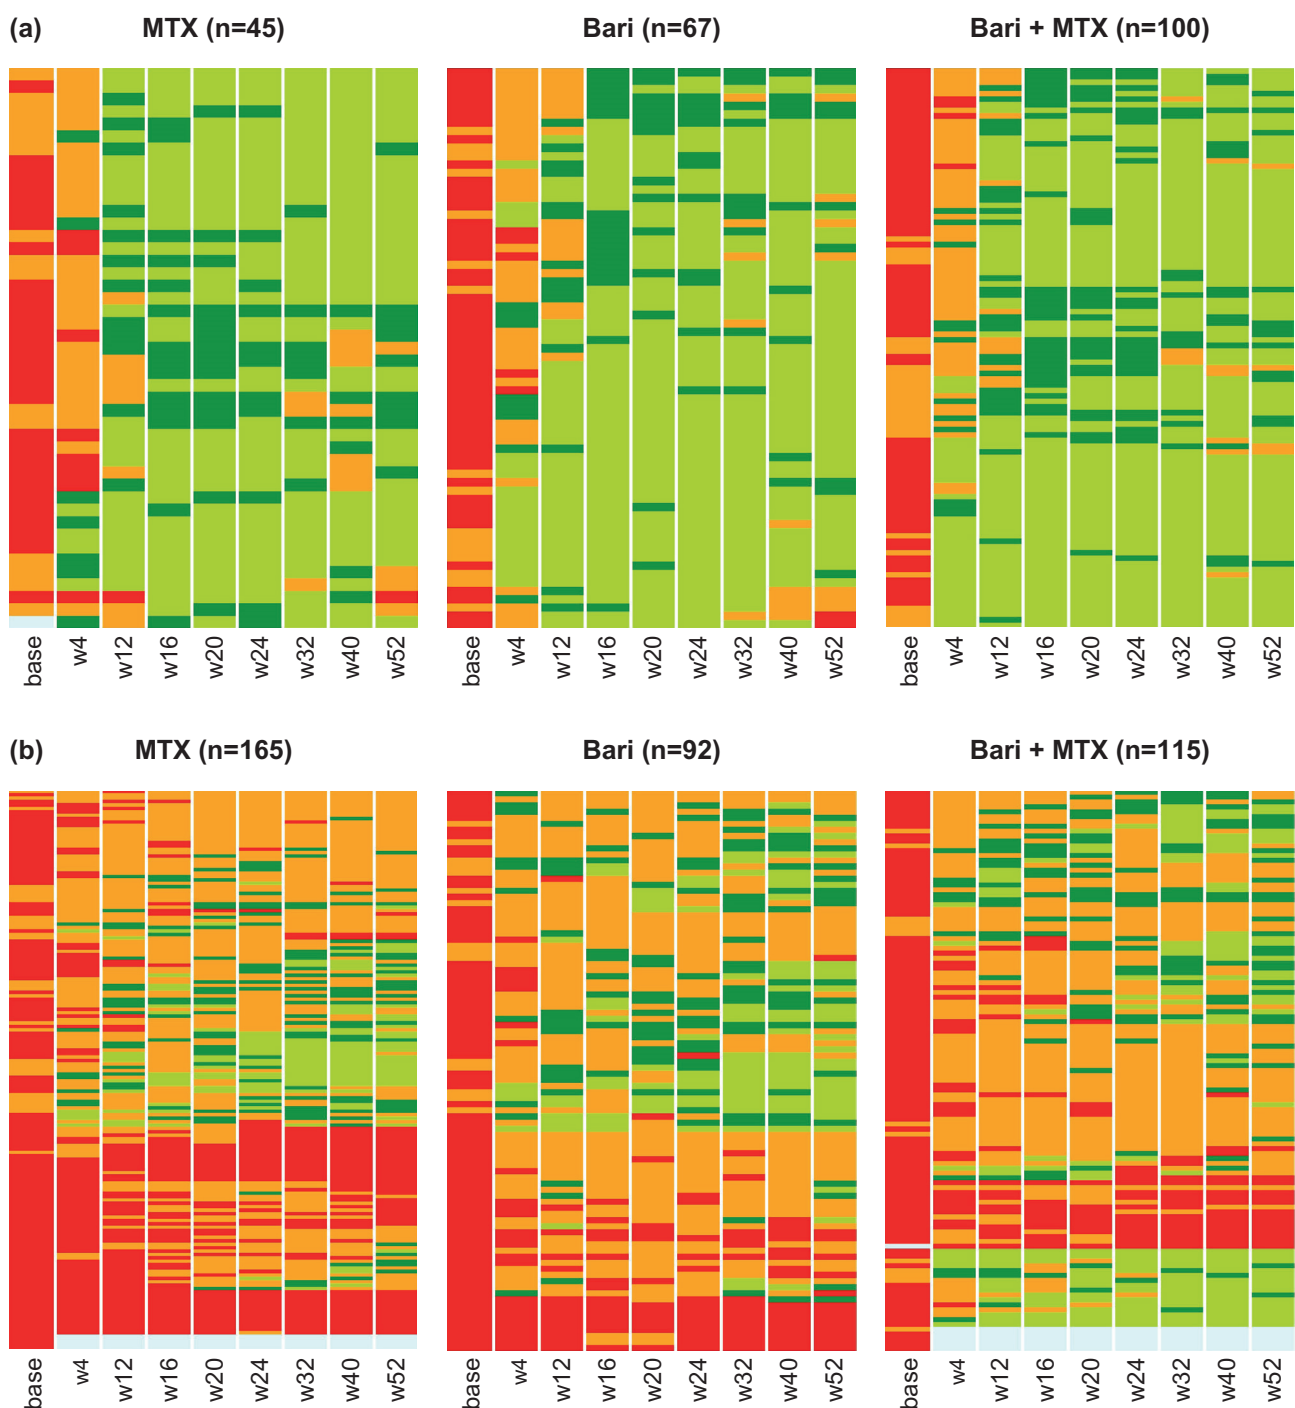

Supplement: 10067_2018_4221_MOESM1_ESM.pdf [file 10067_2018_4221_MOESM1_ESM.pdf]
